# Supplementary material for: A novel orally available Syk/Src/Jak2 inhibitor, SKLB-850, showed potent anti-tumor activities in B cell lymphoma (BCL) models
Source: PubMed Central journal article supplement (PMC5762338; doi:10.18632/oncotarget.22847), 2017-12-01
Supplement: oncotarget-08-111495-s001.pdf [file oncotarget-08-111495-s001.pdf]

# A novel orally available Syk/Src/Jak2 inhibitor, SKLB-850, showed potent anti-tumor activities in B cell lymphoma (BCL) models

## SUPPLEMENTARY MATERIALS

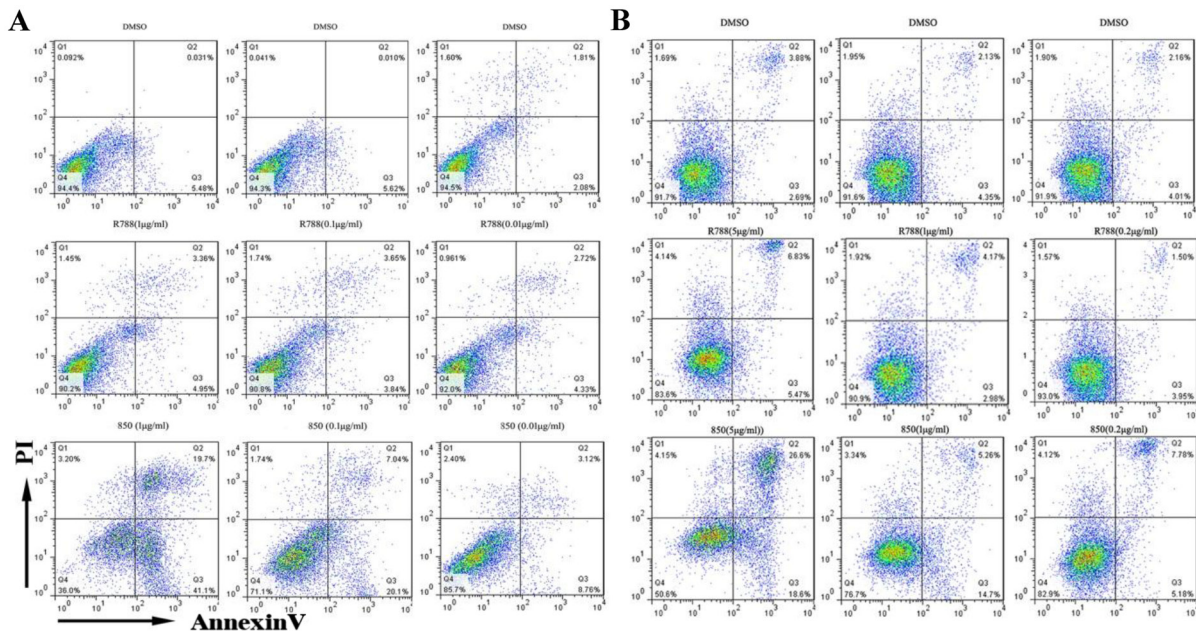

**Supplementary Figure 1: SKLB-850 induced tumor cell apoptosis *in vitro*.** (A) Apoptosis of Ramos cells induced by SKLB-850. (B) Apoptosis of HBL-1 cells induced by SKLB-850. Cells were treated vehicle, R788 or indicated concentrations of compounds. After 18 hours, Cells were harvested and stained with Annexin-V-FITC and propidium iodide, then the apoptosis cells were analyzed by FCM.

**Supplementary Table 1: Patient characteristics**

| Age | Sex    | Disease                      |
|-----|--------|------------------------------|
| 66  | female | Diffuse small B lymphoma     |
| 22  | female | follicular lymphoma          |
| 47  | male   | Chronic Lymphocytic Leukemia |
| 40  | male   | Diffuse large B lymphoma     |
| 63  | female | Diffuse large B lymphoma     |
